# Supplementary material for: Identification and antimicrobial resistance prevalence of pathogenic Escherichia coli strains from treated wastewater effluents in Eastern Cape, South Africa
Source: PubMed Central journal article supplement (PMC4767426; doi:10.1002/mbo3.319), 2016-01-13
Supplement: MBO3-5-143-s001.pdf [file MBO3-5-143-s001.pdf]

Supplementary Table 1. Primer sequences, PCR protocols and sizes of PCR-amplified target genes of *E. coli* pathotypes.

| Target Strains | Target Genes | Primer Sequence (5'→3')                              | Reaction Conditions (°C)                             | Cycles | Amplicon Size (bp) | Positive Control |
|----------------|--------------|------------------------------------------------------|------------------------------------------------------|--------|--------------------|------------------|
| EPEC           | <i>eae</i>   | TCAATGCAGTTCCGTTATCAGTT<br>GTAAAGTCCGTTACCCCAACCTG   | 95°, 94°, 55°, 68°, 72°<br>15', 45'', 45'', 2', 5'   | 35     | 482                | DSM 8695         |
| ETEC           | <i>lt</i>    | GCACACGGAGCTCCTCAGTC<br>TCC TTCATCCTTTCAATGGCTTT     | 95°, 94°, 58°, 72°, 72°<br>3', 30'', 1', 1', 10'     | 35     | 218                | DSM 10973        |
| EAEC           | <i>eagg</i>  | AGACTCTGGCGAAAGACTGTATC<br>ATGGCTGTCTGTAATAGATGAGAAC | 95°, 94°, 55°, 68°, 72°<br>15', 45'', 45'', 2', 5'   | 35     | 194                | DSM 10974        |
| UPEC           | <i>papC</i>  | GACGGCTGTACTGCAGGGTGGCG<br>ATATCCTTTCTGCAGGGATGCAATA | 94°, 94°, 55°, 72°, 72°<br>2', 1', 1', 1', 5'        | 30     | 382                | DSM 4816         |
| NMEC           | <i>ibeA</i>  | TGGAACCCGCTCGTAATATAC<br>CTGCCTGTTCAAGCATTGCA        | 95°, 94°, 58°, 72°, 72°<br>3', 30'', 1', 1', 10'     | 30     | 342                | DSM 10819        |
| DAEC           | <i>daaE</i>  | GAACGTTGGTTAATGTGGGGTAA<br>TATTCACCGGTCGGTTATCAGT    | 94°, 92°, 59°, 72°, 72°<br>2', 30'', 30'', 30'', 5'  | 30     | 542                | -                |
| EIEC           | <i>ipaH</i>  | CTC GGCACGTTTTAATAGTCTGG<br>GTGGAGAGCTGAAGTTTCTCTGC  | 95°, 95°, 55°, 72°, 72°<br>5', 45'', 45'', 45'', 10' | 30     | 320                | DSM 9025         |
