# Supplementary material for: Identification and antimicrobial resistance prevalence of pathogenic Escherichia coli strains from treated wastewater effluents in Eastern Cape, South Africa
Source: PubMed Central journal article supplement (PMC4767426; doi:10.1002/mbo3.319), 2016-01-13
Supplement: MBO3-5-143-s002.pdf [file MBO3-5-143-s002.pdf]

Supplementary Table 2. Primer sequences and PCR conditions for antibiotic resistant determinants assayed.

| Target        | Primer Sequence                                           | Amplicon Size (bp) | PCR Condition                                       | Cycles |
|---------------|-----------------------------------------------------------|--------------------|-----------------------------------------------------|--------|
| <i>strA</i>   | F: CTTGGTGATAACGGCAATTC<br>R: CCAATCGCAGATAGAAGGC         | 546                | 94°, 94°, 68°, 72°, 72°<br>4', 45'', 45'', 45'', 7' | 30     |
| <i>aadA</i>   | F: GTGGATGGCGGCCTGAAGCC<br>R: AATGCCCAGTCGGCAGCG          | 525                | 94°, 94°, 68°, 72°, 72°<br>4', 45'', 45'', 45'', 7' | 30     |
| <i>ampC</i>   | F: TTCTATCAAMACTGGCARCC<br>R: CCYTTTTATGTACCCAYGA         | 550                | 94°, 94°, 60°, 72°, 72°<br>4', 45'', 45'', 45'', 7' | 30     |
| <i>cat I</i>  | F: AGTTGCTCAATGTACCTATAACC<br>R: TTGTAATTCATTAAGCATTCTGCC | 547                | 94°, 94°, 50°, 72°, 72°<br>5', 30'', 30'', 90'', 5' | 30     |
| <i>cat II</i> | F: AACTTTGCCCTTTATCGTC<br>R: TGAAAGCCATCACATACTGC         | 543                | 94°, 94°, 50°, 72°, 72°<br>5', 30'', 30'', 90'', 5' | 30     |
| <i>cmlA1</i>  | F: CACCAATCATGACCAAG<br>R: GGCATCACTCGGCATGGACATG         | 115                | 94°, 94°, 50°, 72°, 72°<br>5', 30'', 30'', 90'', 5' | 30     |
| <i>blaZ</i>   | F: ACTTCAACACCTGCTGCTTTC<br>R: TGACCACTTTTATCAGCAACC      | 490                | 94°, 94°, 60°, 72°, 72°<br>5', 30'', 30'', 90'', 5' | 30     |
| <i>blaTEM</i> | F: TTTCGTGTCGCCCTTATTCC<br>R: CCGGCTCCAGATTTATCAGC        | 690                | 94°, 94°, 60°, 72°, 72°<br>5', 30'', 30'', 90'', 5' | 30     |
| <i>tetA</i>   | F: GCTACATCCTGCTTGCCCTTC<br>R: CATAGATCGCCGTGAAGAGG       | 210                | 94°, 94°, 55°, 72°, 72°<br>5', 60'', 60'', 90'', 5' | 35     |
| <i>tetB</i>   | F: TTGGTTAGGGGCAAGTTTTG<br>R: GTAATGGGCAATAACACCG         | 659                | 94°, 94°, 55°, 72°, 72°<br>5', 60'', 60'', 90'', 5' | 35     |
| <i>tetC</i>   | F: CTTGAGAGCCTTCAACCCAG<br>R: ATGGTCGTCATCTACCTGCC        | 418                | 94°, 94°, 55°, 72°, 72°<br>5', 60'', 60'', 90'', 5' | 35     |
| <i>tetD</i>   | F: AAACCATTACGGCATTCTGC<br>R: GACCGGATACACCATCCATC        | 787                | 94°, 94°, 55°, 72°, 72°<br>5', 60'', 60'', 90'', 5' | 35     |
| <i>tetK</i>   | F: GTAGCGACAATAGGTAATAGT<br>R: GTAGTGACAATAAACCTCCTA      | 460                | 94°, 94°, 55°, 72°, 72°<br>5', 60'', 60'', 90'', 5' | 35     |
| <i>tetM</i>   | F: AGTGGAGCGATTACAGAA<br>R: CATATGTCCTGGCGTGTCTA          | 158                | 94°, 94°, 55°, 72°, 72°<br>5', 60'', 60'', 90'', 5' | 35     |
