# Supplementary material for: Identification and antimicrobial resistance prevalence of pathogenic Escherichia coli strains from treated wastewater effluents in Eastern Cape, South Africa
Source: PubMed Central journal article supplement (PMC4767426; doi:10.1002/mbo3.319), 2016-01-13
Supplement: MBO3-5-143-s004.pdf [file MBO3-5-143-s004.pdf]

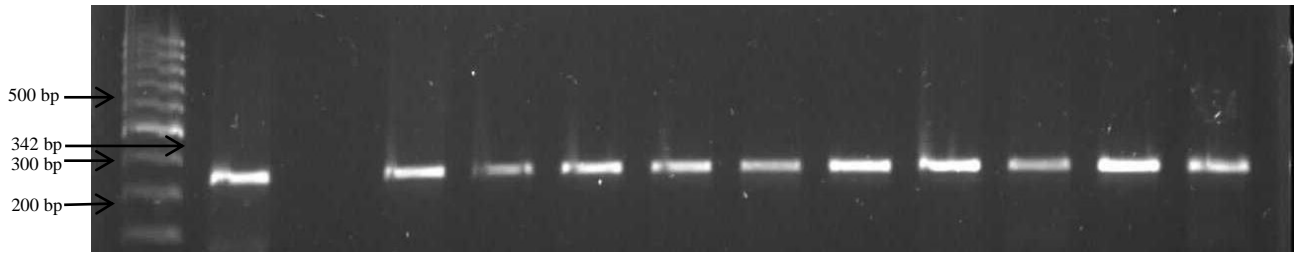

Supplementary Figure 2a. Molecular detection of NMEC pathotype by the amplification of *ibeA* gene (342 bp). Lane M: 100 bp molecular weight marker (Thermo Scientific Inc.); lane P: positive control (*E. coli* DSM 10819 strain); lane N: negative control; lanes 1 to 10 *E. coli* isolates.
